# Supplementary material for: Construction of MoS2/CdS heterojunction catalysts with crystal plane modulation for photocatalytic coupling of benzylamines under aerobic and anaerobic conditions
Source: Royal Society of Chemistry journal article supplement (doi:10.1039/d3cy01282d), 2023-01-01
Supplement: d3cy01282d1.pdf [file d3cy01282d1.pdf]

# **Construction of MoS<sub>2</sub>/CdS heterojunction with crystal plane modulation for photocatalytic coupling of benzylamine under aerobic and anaerobic conditions**

Fangfang Huang, Songyue Zhang, Yuhong Chang, Wenwen Chen\*, Haishun Wu and Jianfeng Jia\*

Key Laboratory of Magnetic Molecules & Magnetic Information Materials Ministry of Education,

School of Chemical and Material Science, Shanxi Normal University, Taiyuan 030006, PR China

## **Characterization**

The morphology, microstructure, and element distribution of the photocatalysts were analyzed by field emission scanning electron microscope (SEM, FEI-F50), energy dispersive spectrometer (EDS) and transmission electron microscope (TEM, FEI Tecnai G2 F30). The crystal structure of the photocatalysts was determined using X-ray diffractometer (SmartLab, Rigaku). X-ray photoelectron spectroscopy (XPS, Thermo Fisher Scientific) was conducted with an Al K $\alpha$  X-ray source. The optical absorption properties of different photocatalysts were evaluated using a UV-Vis spectrophotometer (UV-3600, Shimadzu, Japan). Electrochemical performance was characterized by a CHI660E electrochemical workstation (Chenhua, Shanghai, China). The reactants and products were detected by gas chromatography (Agilent GC 7890B, FID), and the hydrogen generated under nitrogen atmosphere was detected by gas chromatography (GC 9790 II, FuLi, TCD). The superoxide radicals generated in photocatalytic system are analyzed by electron spin resonance (ESR) spectrometer (Bruker A300) using 5,5-dimethyl-1-pyrroline N-oxide (DMPO) as the radical trapping reagent.

## **Results and discussion**

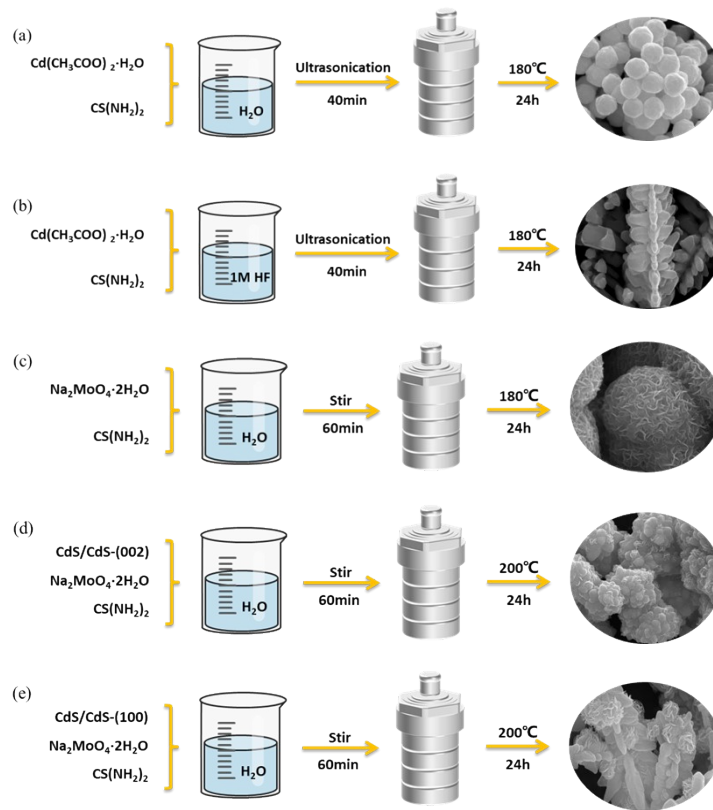

**Fig. S1** Schematic illustration of the synthesis of (a) CdS-(002), (b) CdS-(100), (c) MoS<sub>2</sub>, (d) MoS<sub>2</sub>/CdS-(002) and (e) MoS<sub>2</sub>/CdS-(100).

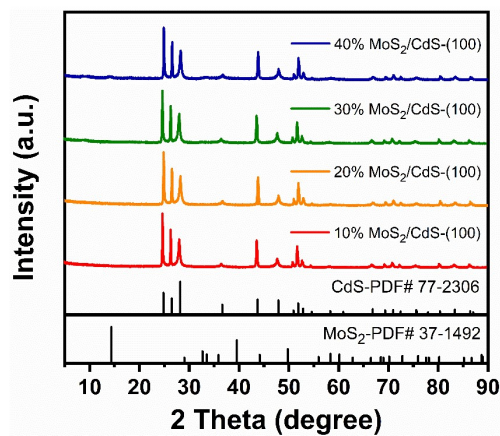

**Fig. S2** XRD patterns of MoS<sub>2</sub>/CdS-(100) with different mass ratios.

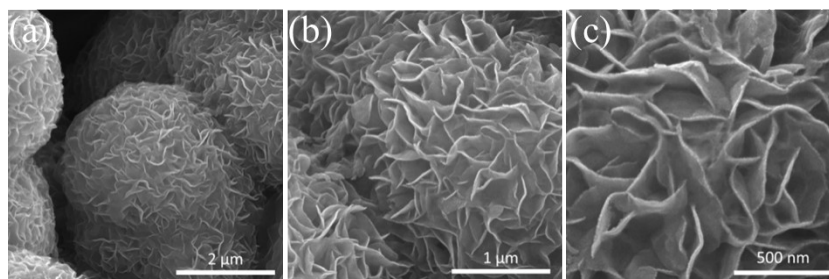

Fig. S3 SEM images of MoS<sub>2</sub>.

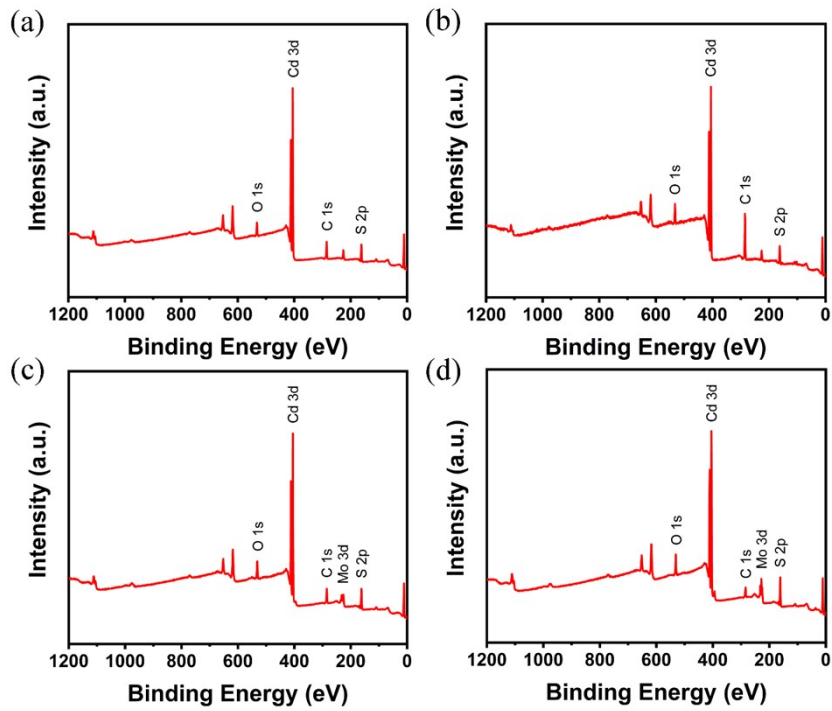

Fig. S4 XPS survey spectra of (a) CdS-(002), (b) CdS-(100), (c) 20% MoS<sub>2</sub>/CdS-(002) and (d) 20% MoS<sub>2</sub>/CdS-(100).

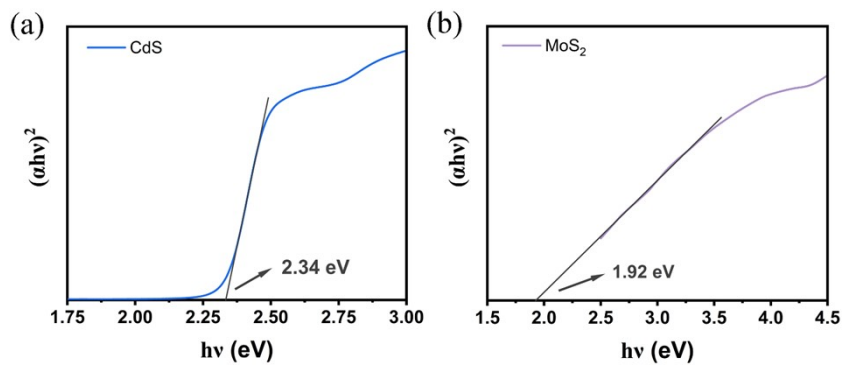

Fig. S5 Tauc plots of (a) CdS and (b) MoS<sub>2</sub>.

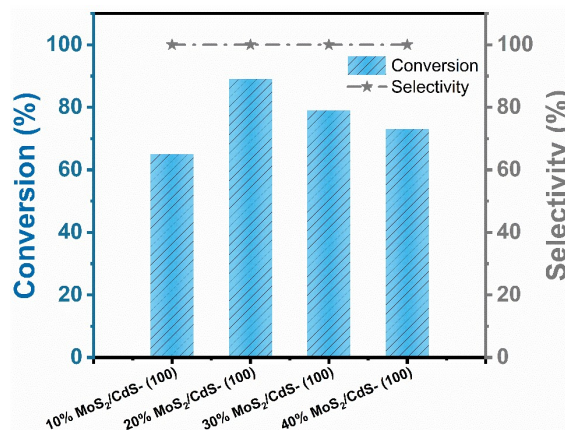

**Fig. S6** Photocatalytic activity test of MoS<sub>2</sub>/CdS-(100) with different mass ratios.

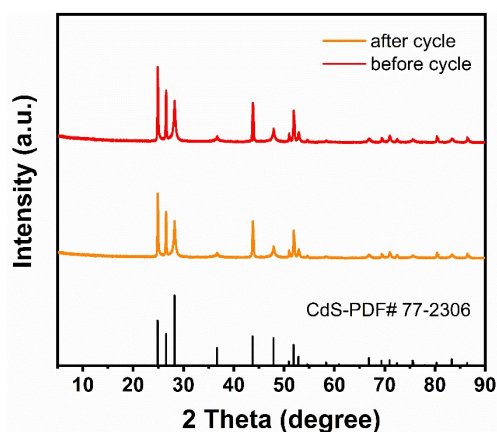

**Fig. S7** XRD patterns of 20% MoS<sub>2</sub>/CdS-(100) before and after stability test.

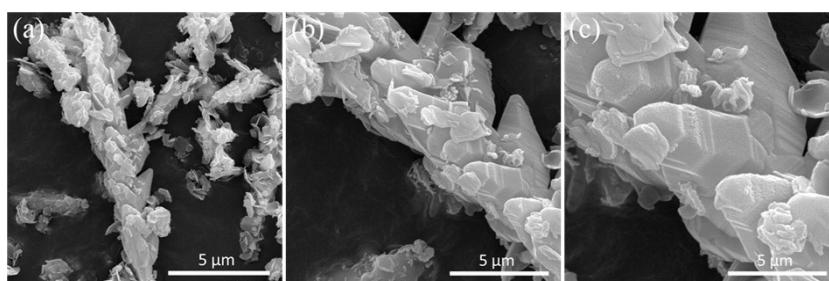

**Fig. S8** SEM images of 20% MoS<sub>2</sub>/CdS-(100) before and after stability test.

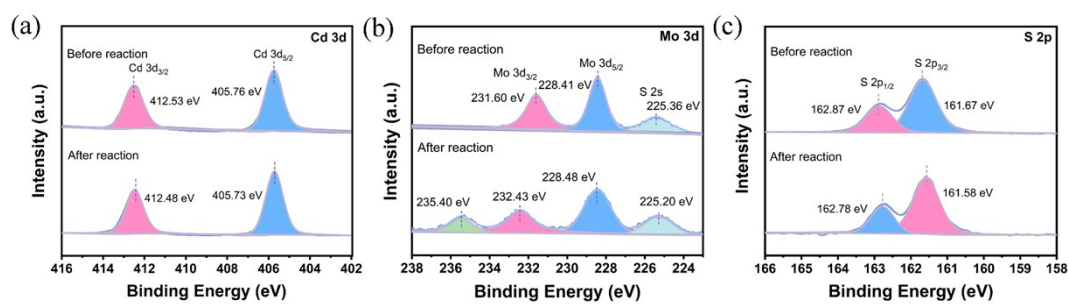

**Fig. S9** XPS spectra of 20% MoS<sub>2</sub>/CdS-(100) before and after stability test.

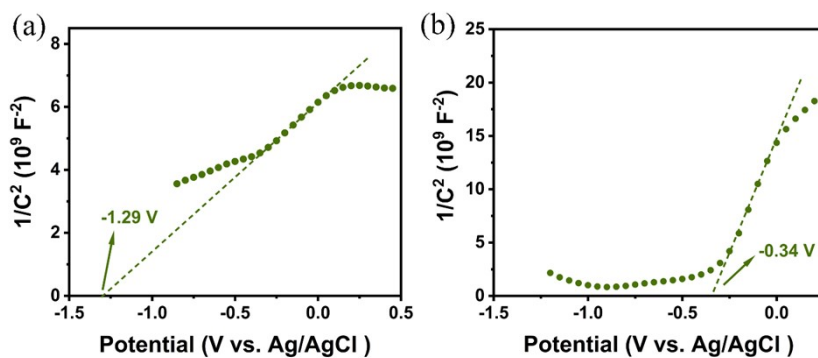

**Fig. S10** Mott-Schottky plots measured at 1000 Hz of (a) CdS and (b) MoS<sub>2</sub>.

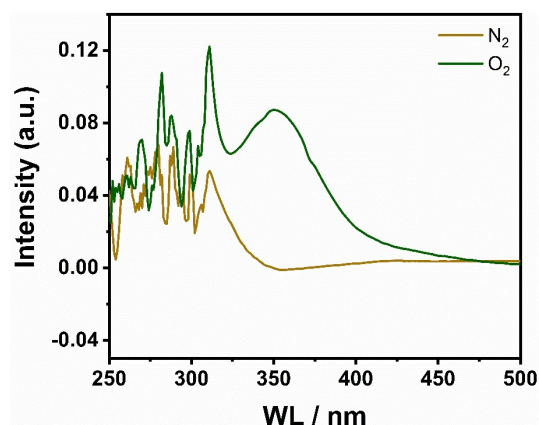

**Fig. S11** The UV-Vis spectrum after adding iodide ions to the solution after the reaction of

benzylamine.

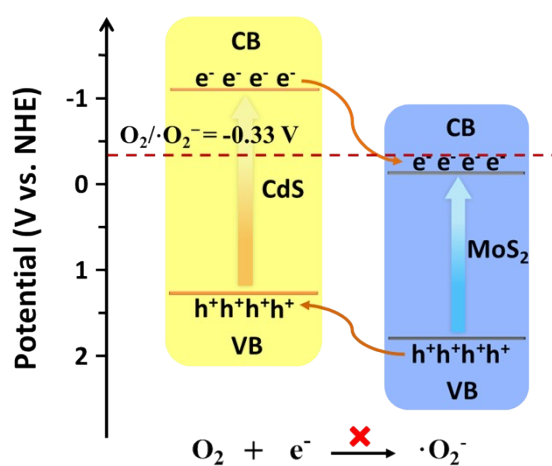

**Fig. S12** Schematic diagram of the charge transfer in the type II heterojunction.

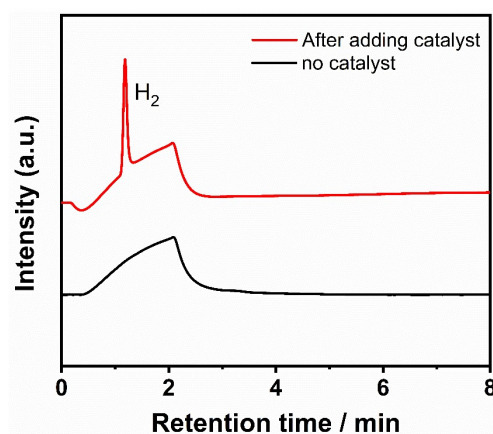

**Fig. S13** GC spectra of H<sub>2</sub> produced in the reaction system under anaerobic condition.

**Table S1** Photocatalytic activity test of CdS and MoS<sub>2</sub>/CdS composites with different ratios<sup>a</sup>.

| Entry | Catalyst                        | Conv. (%) | Sel. (%) |
|-------|---------------------------------|-----------|----------|
| 1     | MoS <sub>2</sub>                | 2         | >99      |
| 2     | CdS-(002)                       | 24        | >99      |
| 3     | CdS-(100)                       | 35        | >99      |
| 4     | 10% MoS <sub>2</sub> /CdS-(100) | 65        | >99      |
| 5     | 20% MoS <sub>2</sub> /CdS-(100) | 89        | >99      |
| 6     | 20% MoS <sub>2</sub> /CdS-(002) | 73        | >99      |
| 7     | 30% MoS <sub>2</sub> /CdS-(100) | 79        | >99      |
| 8     | 40% MoS <sub>2</sub> /CdS-(100) | 73        | >99      |

<sup>a</sup>Reaction conditions: benzylamine (0.1 mmol), catalyst (10 mg), solvent (4 mL acetonitrile), 30 W White LED, reaction for 5 h, air atmosphere.

**Table S2** Controlled experiment of photocatalyst visible-light photocatalytic benzylamine coupling<sup>a</sup>.

| Entry          | Catalyst                        | Solvent             | Atm.           | Light     | Conv. (%) | Sel. (%) |
|----------------|---------------------------------|---------------------|----------------|-----------|-----------|----------|
| 1              | -                               | CH <sub>3</sub> CN  | Air            | White LED | -         | -        |
| 2 <sup>b</sup> | 20% MoS <sub>2</sub> /CdS-(100) | CH <sub>3</sub> CN  | Air            | -         | -         | -        |
| 3 <sup>c</sup> | 20% MoS <sub>2</sub> /CdS-(100) | CH <sub>3</sub> CN  | Air            | White LED | 89        | >99      |
| 4              | 20% MoS <sub>2</sub> /CdS-(100) | CH <sub>3</sub> CN  | Air            | White LED | >99       | >99      |
| 5 <sup>d</sup> | 20% MoS <sub>2</sub> /CdS-(100) | CH <sub>3</sub> CN  | Air            | White LED | 91        | >99      |
| 6              | 20% MoS <sub>2</sub> /CdS-(100) | CH <sub>3</sub> OH  | Air            | White LED | 87        | >99      |
| 7              | 20% MoS <sub>2</sub> /CdS-(100) | DMF                 | Air            | White LED | >99       | 92       |
| 8              | 20% MoS <sub>2</sub> /CdS-(100) | 1, 2-Dichloroethane | Air            | White LED | >99       | 97       |
| 9              | 20% MoS <sub>2</sub> /CdS-(100) | THF                 | Air            | White LED | 85        | 34       |
| 10             | 20% MoS <sub>2</sub> /CdS-(100) | DMSO                | Air            | White LED | >99       | 92       |
| 11             | 20% MoS <sub>2</sub> /CdS-(100) | 1,4-Dioxane         | Air            | White LED | 22        | >99      |
| 12             | 20% MoS <sub>2</sub> /CdS-(100) | Toluene             | Air            | White LED | 18        | >99      |
| 13             | 20% MoS <sub>2</sub> /CdS-(100) | CH <sub>3</sub> CN  | Air            | Red LED   | -         | -        |
| 14             | 20% MoS <sub>2</sub> /CdS-(100) | CH <sub>3</sub> CN  | Air            | Green LED | 92        | >99      |
| 15             | 20% MoS <sub>2</sub> /CdS-(100) | CH <sub>3</sub> CN  | Air            | Blue LED  | >99       | >99      |
| 16             | 20% MoS <sub>2</sub> /CdS-(100) | CH <sub>3</sub> CN  | O <sub>2</sub> | White LED | >99       | >99      |
| 17             | 20% MoS <sub>2</sub> /CdS-(100) | CH <sub>3</sub> CN  | N <sub>2</sub> | White LED | >99       | >99      |

<sup>a</sup>Reaction conditions: benzylamine (0.1 mmol), catalyst (15 mg), solvent (4 mL), reaction for 5 h.

<sup>b,c</sup>The amount of catalyst is 10 mg.

<sup>d</sup>Reaction for 4 h.

**Table S3** Photocatalytic benzylamine coupling uses different catalysts.

| photocatalysts                                    | Light sources                                   | Reaction conditions                                                | Efficiencies<br>( $\mu\text{mol g}^{-1} \text{h}^{-1}$ ) | Ref.         |
|---------------------------------------------------|-------------------------------------------------|--------------------------------------------------------------------|----------------------------------------------------------|--------------|
| MoS <sub>2</sub> /CdS                             | 30 W white<br>LED                               | 15 mg catalyst; 0.1mmol<br>benzylamine; 4 mL CH <sub>3</sub> CN    | 667                                                      | This<br>work |
| g-C <sub>3</sub> N <sub>4</sub> /BiOBr            | 50 W white<br>LED                               | 100 mg catalyst; 5 mM<br>benzylamine; 25 mL CH <sub>3</sub> CN     | 313                                                      | 1            |
| TiO <sub>2</sub> /g-C <sub>3</sub> N <sub>4</sub> | 50 W halogen<br>lamp                            | 10 mg catalyst; 0.2mmol<br>benzylamine; 2 mL toluene               | 375                                                      | 2            |
| CdS/Ti <sub>3</sub> C <sub>2</sub> T <sub>x</sub> | 300 W Xe lamp<br>( $\lambda > 420 \text{ nm}$ ) | 10 mg catalyst; 5 mL DMF-<br>based solution with H <sub>2</sub> O  | 156                                                      | 3            |
| 2D-MoS <sub>2</sub>                               | 45 W white<br>LED                               | 3 mg catalyst; 80°C; 0.1 mmol<br>benzylamine                       | 23                                                       | 4            |
| TiO <sub>2</sub> (B)/anatase                      | 300 W Xe lamp<br>( $\lambda > 420 \text{ nm}$ ) | 50 mg catalyst; 0.25 mmol<br>benzylamine; 10 mL CH <sub>3</sub> CN | 329                                                      | 5            |
| Pd/NH <sub>2</sub> -MIL-125                       | 300 W Xe lamp<br>( $\lambda > 420 \text{ nm}$ ) | 5 mg catalyst; 0.1 mmol<br>benzylamine; 2 mL CH <sub>3</sub> CN    | 819                                                      | 6            |
| PCN                                               | 300 W Xe lamp<br>( $\lambda > 420 \text{ nm}$ ) | 20 mg catalyst; 10 mL<br>benzylamine; 50 mL deionized<br>water     | 417                                                      | 7            |
| Pd/BiOCl                                          | 300 W Xe lamp<br>( $\lambda > 420 \text{ nm}$ ) | 10 mg catalyst; 0.2mmol<br>benzylamine; 1.5 mL CH <sub>3</sub> CN  | 833                                                      | 8            |
| Q-BiVO <sub>4</sub>                               | 300 W Xe lamp<br>( $\lambda > 420 \text{ nm}$ ) | 10 mg catalyst; 0.1 mmol<br>benzylamine; 5 mL CH <sub>3</sub> CN   | 32                                                       | 9            |
| Bi <sub>5</sub> O <sub>7</sub> I-(010)            | 15 W Philips<br>lamp                            | 100 mg catalyst; 0.1 mmol<br>benzylamine; 5 mL CH <sub>3</sub> CN  | 28                                                       | 10           |

## References

- 1 S. Juntrapirom, S. Anuchai, O. Thongsook, S. Pornsuwan, P. Meepowpan, P. Thavornyutikarn, S. Phanichphant, D. Tantraviwat and B. Inceesungvorn, *Chem. Eng. J.*, 2020, **394**, 124934.
- 2 Y. Zhang, J. Xu, J. Mei, S. Sarina, Z. Wu, T. Liao, C. Yan, Z and Sun, *J. Hazard. Mater.*, 2020, **394**, 122529.
- 3 H. Wang, P. Hu, J. Zhou, M. B. J. Roeffaers, B. Weng, Y. Wang and H. Ji, *J. Mater. Chem. A*, 2021, **9**, 19984-19993.
- 4 Y.R. Girish, R. Biswas and M. De, *Chem. Eur. J.*, 2018, **24**, 13871-13878.
- 5 J. Dai, J. Yang, X. Wang, L. Zhang and Y. Li, *Appl. Surf. Sci.*, 2015, **349**, 343-352.

- 6 H. Wang, J. Yu, S. Wei, M. Lin, Y. Song and L. Wu, *Chem. Eng. J.*, 2022, **441**, 136020.
- 7 M. Song, H. Song, P. Chen, D.-H. Lan, F. Liu, C.-T. Au and S.-F. Yin, *ACS Sustain. Chem. Eng.*, 2023, **11**, 8096-8105.
- 8 S. Wei, H. Zhong, H. Wang, Y. Song, C. Jia, M. Anpo and L. Wu, *Appl. Catal. B-Environ.*, 2022, **305**, 121032.
- 9 M. Lv, F. Tong, Z. Wang, Y. Liu, P. Wang, H. Cheng, Y. Dai and Z. Zheng, B. Huang, *J. Mater. Chem. A*, 2022, **10**, 19699-19709.
- 10 F. Wang, X. Han, Z. Jia, Y. Li, T. Zhang, A. Han and J. Liu, *Catal. Sci. Technol.*, 2021, **11**, 6947-6951.
